# Supplementary material for: Seeking the most stable isomer of azahomocubanes
Source: Royal Society of Chemistry journal article supplement (doi:10.1039/d3ra05117j), 2023-01-01
Supplement: d3ra05117j1.pdf [file d3ra05117j1.pdf]

# Supplementary Information

## Seeking the Most Stable Isomer of Azahomocubanes

María A. Fernández-Herrera,<sup>1,\*</sup> Joaquín Barroso-Flores,<sup>2,3</sup> Gabriel Merino.<sup>1,\*</sup>

<sup>1</sup> Departamento de Física Aplicada, Centro de Investigación y de Estudios Avanzados, Unidad Mérida. Km 6 Antigua Carretera a Progreso. Apdo. Postal 73, Cordemex, 97310, Mérida, Yuc., México.

<sup>2</sup> Instituto de Química, Universidad Nacional Autónoma de México, Circuito Exterior SN, Ciudad Universitaria, Alcaldía Coyoacán, CDMX, 04510, Mexico

<sup>3</sup> Centro Conjunto de Investigación en Química Sustentable UAEM - UNAM, Carr. Toluca-Atlacomulco km 14.5. Campus El Rosedal, Toluca de Lerdo, Estado de México 50200, Mexico

E-mail: [gmerino@cinvestav.mx](mailto:gmerino@cinvestav.mx)  
mfernandez@cinvestav.mx

**Table 1SI.** T1-diagnostic values obtained from CCSD(T1diag) computations for **1-4** and their corresponding protonation species.

|                        | T1-diagnostic value |
|------------------------|---------------------|
| <b>1</b>               | 0.0102              |
| <b>2</b>               | 0.0098              |
| <b>3</b>               | 0.0103              |
| <b>4</b>               | 0.0100              |
| <b>1-H<sup>+</sup></b> | 0.0093              |
| <b>2-H<sup>+</sup></b> | 0.0098              |
| <b>3-H<sup>+</sup></b> | 0.0096              |
| <b>4-H<sup>+</sup></b> | 0.0098              |

**Table 2SI.** Relative energies in kcal/mol computed in the gas phase at the CCSD(T)/cc-pVTZ//M06-2X-D3/def2-TZVP and at M06-2X-D3/def2-TZVP levels. Solvent effects were taken into account at the M06-2X-D3/def2-TZVP level by employing the polarizable continuum model (PCM).

|          | gas phase | gas phase DFT | H <sub>2</sub> O | CH <sub>3</sub> OH | C <sub>6</sub> H <sub>6</sub> | CH <sub>3</sub> COOH | CH <sub>2</sub> Cl <sub>2</sub> | CHCl <sub>3</sub> |
|----------|-----------|---------------|------------------|--------------------|-------------------------------|----------------------|---------------------------------|-------------------|
| <b>1</b> | 0.0       | 0.0           | 0.0              | 0.0                | 0.0                           | 0.0                  | 0.0                             | 0.0               |
| <b>2</b> | 1.9       | 3.3           | 2.6              | 2.6                | 2.9                           | 2.7                  | 2.7                             | 2.7               |
| <b>3</b> | 3.2       | 3.8           | 3.9              | 3.9                | 3.8                           | 3.8                  | 3.9                             | 3.9               |
| <b>4</b> | 3.4       | 4.6           | 4.3              | 4.3                | 4.5                           | 4.4                  | 4.3                             | 4.3               |
